# Supplementary material
Source: HighWire-hosted journal article supplement (http://www.qdcxjkg.com/highwire/filestream/113717/field_highwire_adjunct_files/0/erj00892-2012_online_supplementary_material.pdf)
Supplement: erj00892-2012_online_supplementary_material.pdf [file erj00892-2012_online_supplementary_material.pdf]

**Outcome of non-cardiac, non-obstetric surgery in patients with pulmonary arterial hypertension: results from an international prospective survey**

**Online supplementary material**

**Table S1: List of centres and number of patients**

| Centre    | Number of patients |
|-----------|--------------------|
| Baltimore | 2                  |
| Chicago   | 6                  |
| Colorado  | 13                 |
| Clamart   | 31                 |
| Boston    | 2                  |
| Roma      | 7                  |
| Michigan  | 21                 |
| Barcelona | 4                  |
| Dresden   | 1                  |
| Leipzig   | 17                 |
| Hannover  | 10                 |

**Table S2 Baseline variables of patients undergoing emergency and non-emergency surgery**

|                                                  | <b>Emergency surgery<br/>(n=13)</b> | <b>Non-emergency<br/>surgery (n=101)</b> |
|--------------------------------------------------|-------------------------------------|------------------------------------------|
| <b>Hemodynamics</b>                              |                                     |                                          |
| mean RAP [mmHg] (n=111)                          | 6 (3-10)                            | 7 (3-10)                                 |
| mean PAP [mmHg] (n=114)                          | 45 (38-54)                          | 45 (38-55)                               |
| mean PCWP [mmHg] (n=106)                         | 9 (6.5-11.5)                        | 9 (6-12)                                 |
| Cardiac output [L/min] (n=113)                   | 5 (4.3-6)                           | 5 (4.2-5.9)                              |
| Cardiac index [L/min/m <sup>2</sup> ]<br>(n=100) | 2.9 (2.4-3.5)                       | 2.9 (2.5-3.5)                            |
| PVR [dyn·s·cm <sup>-5</sup> ] (n=111)            | 603 (384-808)                       | 579 (368-804)                            |
| SvO <sub>2</sub> [%] (n=87)                      | 67 (63-70)                          | 66 (63-70)                               |

| Interval between last RHC and surgery [months]     | 9 (4-26) | 9 (4-26) | <b>Abbreviations:</b><br>Data presented as median (interquartile range) or n (%). |
|----------------------------------------------------|----------|----------|-----------------------------------------------------------------------------------|
| <b>NYHA class<sup>1</sup> and 6MWD<sup>2</sup></b> |          |          |                                                                                   |
| NYHA I/II                                          | 7 (54)   | 54 (53)  |                                                                                   |
| NYHA III/IV                                        | 6 (46)   | 43 (43)  |                                                                                   |
| 6MWD < 399 m                                       | 7 (54)   | 39 (39)  |                                                                                   |
| 6MWD > 399 m                                       | 2 (15)   | 47 (47)  |                                                                                   |
| <b>Type of surgery</b>                             |          |          |                                                                                   |
| Abdominal n [%]                                    | 9 (69)   | 36 (36)  | NYHA,                                                                             |
| Gynaecology/urology n [%]                          | 1 (8)    | 21 (21)  | New                                                                               |
| Trauma/orthopaedic n [%]                           | 1 (8)    | 20 (20)  | York                                                                              |
| Other n [%]                                        | 2 (15)   | 24 (22)  | Heart<br>Associat                                                                 |

ion; 6MWD, 6-minute walk distance; mean RAP, mean right atrial pressure; mean PAP, mean pulmonary arterial pressure; mean PCWP, mean pulmonary capillary wedge pressure; PVR, pulmonary vascular resistance; RHC, right heart catheterisation; SvO<sub>2</sub>, mixed venous oxygen saturation; <sup>1</sup>missing n=4, <sup>2</sup>missing n=9

**Table S3 Detailed list of surgical interventions**

| <b>Surgery</b>                 | <b>Number of cases (All patients) (n=114)</b> | <b>Number of cases</b> |                       |
|--------------------------------|-----------------------------------------------|------------------------|-----------------------|
|                                |                                               | <b>POC (n=7)</b>       | <b>No POC (n=107)</b> |
| <b>Abdominal</b>               | <b>46 (40)</b>                                | <b>4 (57)</b>          | <b>42 (39)</b>        |
| Open cholecystectomy           | 3 (3)                                         | 1 (14)                 | 2 (2)                 |
| Laparoscopic cholecystectomy   | 14 (12)                                       | 1 (14)                 | 13 (12)               |
| Bowel obstruction              | 5 (4)                                         | 1 (14)                 | 4 (4)                 |
| Abdominal compartment syndrome | 1 (1)                                         | 0 (0)                  | 1 (1)                 |
| Herniotomie                    | 10 (9)                                        | 0 (0)                  | 10 (9)                |

|                                      |                |               |                |
|--------------------------------------|----------------|---------------|----------------|
| Appendectomy                         | 2 (2)          | 0 (0)         | 2 (2)          |
| Hemicolectomy                        | 5 (4)          | 0 (0)         | 5 (5)          |
| Retrocession of artificial anus      | 1 (1)          | 0 (0)         | 1 (1)          |
| Colpopexy and cystoscopy             | 1 (1)          | 0 (0)         | 1 (1)          |
| ERCP                                 | 1 (1)          | 0 (0)         | 1 (1)          |
| Liver transplantation                | 1 (1)          | 0 (0)         | 1 (1)          |
| Gastric perforation                  | 1 (1)          | 0 (0)         | 1 (1)          |
| Explorative laparotomy               | 1 (1)          | 1 (14)        | 0 (0)          |
| <b>Trauma and orthopedic surgery</b> | <b>21 (18)</b> | <b>1 (14)</b> | <b>20 (19)</b> |
| Knee surgery                         | 5 (4)          | 0 (0)         | 5 (5)          |
| Hip surgery                          | 13 (11)        | 1 (14)        | 12 (11)        |
| Underarm surgery                     | 1 (1)          | 0 (0)         | 1 (1)          |
| Foot surgery                         | 1 (1)          | 0 (0)         | 1 (1)          |
| n/a                                  | 1 (1)          | 0 (0)         | 1 (1)          |
| <b>Dental surgery</b>                | <b>1 (1)</b>   | <b>0 (0)</b>  | <b>1 (1)</b>   |
| <b>ENT</b>                           | <b>10 (9)</b>  | <b>0 (0)</b>  | <b>10 (9)</b>  |
| Partial pharyngectomy                | 2 (2)          | 0 (0)         | 2 (2)          |
| Laryngoscopy                         | 3 (3)          | 0 (0)         | 3 (3)          |
| Hemiglossectomy                      | 2 (2)          | 0 (0)         | 2 (2)          |
| Ear surgery                          | 1 (1)          | 0 (0)         | 1 (1)          |
| Septoplastic surgery                 | 1 (1)          | 0 (0)         | 1 (1)          |
| Mastoiditis                          | 1 (1)          | 0 (0)         | 1 (1)          |
| <b>General surgery</b>               | <b>6 (5)</b>   | <b>0 (0)</b>  | <b>6 (6)</b>   |
| Thyreodectomy                        | 3 (3)          | 0 (0)         | 3 (3)          |
| Port implantation                    | 1 (1)          | 0 (0)         | 1 (1)          |
| Thoracoscopy                         | 1 (1)          | 0 (0)         | 1 (1)          |
| Lymph node biopsy                    | 1 (1)          | 0 (0)         | 1 (1)          |
| <b>Gynaecology</b>                   | <b>18 (16)</b> | <b>1 (14)</b> | <b>17 (16)</b> |

|                        |       |        |       |
|------------------------|-------|--------|-------|
| Hysterectomy           | 9 (8) | 0 (0)  | 9 (8) |
| Annessiectomy          | 1 (1) | 0 (0)  | 1 (1) |
| Ovariectomy            | 2 (2) | 0 (0)  | 2 (2) |
| Cervix-PE and abrasion | 1 (1) | 0 (0)  | 1 (1) |
| Breast surgery         | 5 (4) | 1 (14) | 4 (4) |
| Neurosurgery           | 3 (3) | 0 (0)  | 3 (3) |
| Thoracic surgery       | 1 (1) | 0 (0)  | 1 (1) |
| Urology                | 4 (4) | 0 (0)  | 4 (4) |
| Orchiectomy            | 1 (1) | 0 (0)  | 1 (1) |
| Prostatectomy          | 1 (1) | 0 (0)  | 1 (1) |
| Ureteroscopy           | 2 (2) | 0 (0)  | 2 (2) |
| Vascular surgery       | 4 (4) | 1 (14) | 3 (3) |
| Carotid endarterectomy | 1 (1) | 0 (0)  | 1 (1) |
| Arteriovenous fistula  | 1 (1) | 0 (0)  | 1 (1) |
| Saphenectomy           | 1 (1) | 1 (14) | 0 (0) |
| Revascularisation      | 1 (1) | 0 (0)  | 1 (1) |

**Abbreviations:** Data presented as median (interquartile range) or n (%). POC, Perioperative complication; ERCP, endoscopic retrograde cholangiopancreatography; ENT, ear, nose and throat

Questionnaire used for the surgery registry

# Major Surgery

Sheet I: Please fill out this form for each patient meeting the inclusion and exclusion criteria

**Center:** . . . . .

**Date of Surgery:** . . . . .

. . . . .

**Patient:** Center-ID . . . . . Gender:

Female  Male Age: . . . . .years

**Diagnosis:**  IPAH

FPAH

PAH associated with

Connective tissue disease

disease

Congenital heart

Portal

Hypertension

HIV infection

Appetite

suppressants

Other . . . . .

. . . . .

**NYHA-class at last assessment:**

NYHA I,  NYHA II,  NYHA III,

NYHA IV

**6 min walk test at last assessment:** . . . .

. . .m

**Hemodynamics at last assessment:**

Date: . . . . .

Right atrial

pressure . . . . . mmHg

Mean PAP . . . . .

mmHg

PCWP . . . . .

mmHg

Cardiac output . . .

. . . . l/min

Cardiac index . . . .

. . l/min/m<sup>2</sup>

PVR . . . . .

dyn.s.cm-5 or . . . . . WU

SvO<sub>2</sub> . . . . . %

**Background PAH medication (please tick all the apply):**



Oral anticoagulant

IV Prostanoid

Epoprostenol

Iloprost

Treprostinil

SC Prostanoid

Inhaled Prostanoid

Iloprost

Treprostinil

Endothelin

receptor antagonist

Bosentan

Sitaxentan

Ambrisentan

Phosphodiesterase-5 inhibitor

Sildenafil

Tadalafil

Calcium channel

blocker (responders only)

Other . . . . .

. . . . .

. . .

**Was PAH medication (excluding anticoagulants) maintained in the perioperative period?**

Yes

No

**How was anticoagulation managed during the perioperative period?**

- No anticoagulation was used at all
- Baseline therapy included a Vitamin-K antagonist, which was temporarily replaced by heparin (either IV or SC)
- Baseline therapy included a Vitamin-K antagonist, which was continued at a lower dose

- Baseline therapy included a Vitamin-K antagonist, which was temporarily interrupted without the use of another anticoagulant
- There was no baseline anticoagulation but heparin was used during the perioperative period
- Other . . . . .  
. . . . .

**Information about surgical precedence**

- Emergency surgery
- Intermediate urgency
- Elective surgery

**Brief description of surgical procedure:**

.....

.....

.....

.....

.....

.....

**Estimated blood loss > 1 liter**

Yes  No

**Septic surgery**  Yes

No

**Systemic inflammatory response**

Yes  No

**Vasopressors required**

Yes

No

**Swan Ganz catheter used**

Yes

No

**Anaesthesia:**  General anaesthesia

(please state medication used for  
anaesthesia if available) . . . . .

. . . . .

. . . . .

. . . . .

. . . . .

Spinal anaesthesia

**Outcome:**

Death

Survived without  
sequelae

Survived with  
sequelae (Please  
explain): . . . . .  
. . . . .  
. . . . .

**Was surgery performed at a center  
with special expertise in the  
management of PAH?**

No

Yes

**Did complications occur that could have been related to PAH or medication?**

No

Yes

**if yes, please describe briefly: . . . . .**

. . . . .

. . . . .



.....

.....

.....

.....

.....

**Did the patient require additional PAH treatment in the perioperative period?**

No

Yes

**if yes, please tick all that apply:**

Inhaled nitric oxide (NO)

IV Prostanoid

SC Prostanoid

Inhaled Prostanoid

Endothelin

receptor antagonist

Phosphodiesterase-5 inhibitor

Catecholamines

Other . . . . .

. . . . .

Further comments: .....  
.....  
.....  
.....
